# Supplementary material
Source: HighWire-hosted journal article supplement (http://www.cmaj.ca/highwire/filestream/59963/field_highwire_adjunct_files/0/160459-image-1-at.pdf)
Supplement: 160459-image-1-at.pdf [file 160459-image-1-at.pdf]

## Appendix 1 (as supplied by the author): Ocular ischemic syndrome

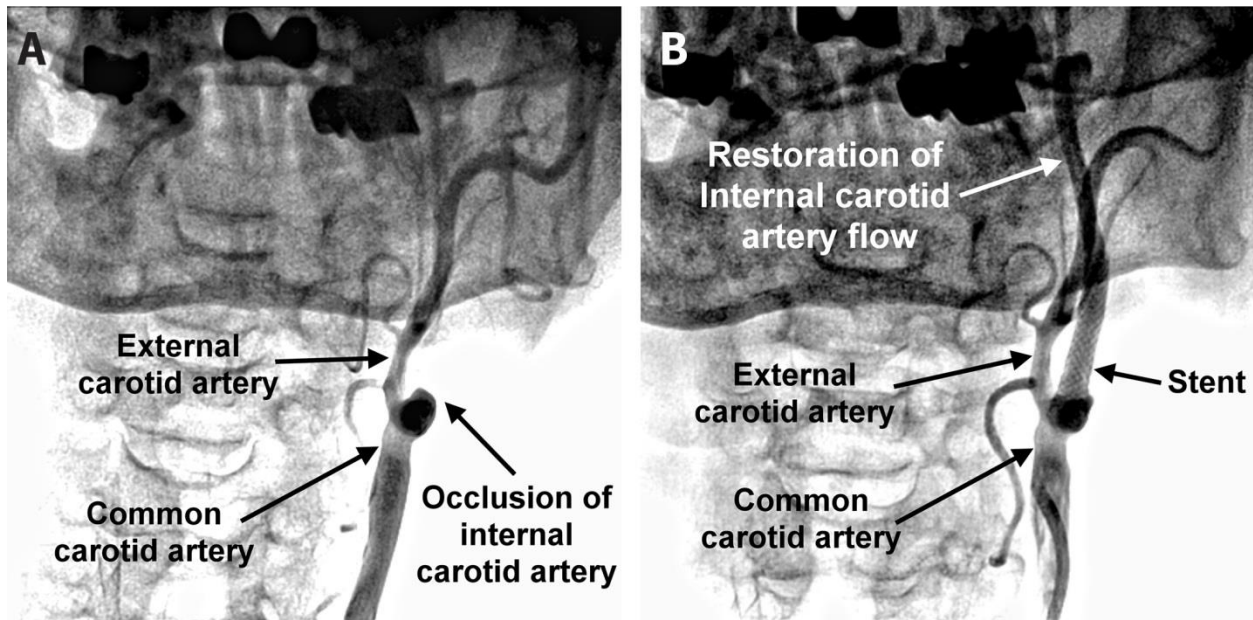

(A) Carotid angiography showing total occlusion of the left internal carotid artery. (B) Blood flow of left internal carotid artery restored after subsequent angioplasty with stenting.
